# Supplementary material for: Isolation of U(ii) compounds using strong donor ligands, C5Me4H and N(SiMe3)2, including a three-coordinate U(ii) complex
Source: Royal Society of Chemistry journal article supplement (doi:10.1039/c8cc08767a), 2019-01-01
Supplement: c8cc08767a1.pdf [file c8cc08767a1.pdf]

## Table of Contents

|                                                                                                         |              |
|---------------------------------------------------------------------------------------------------------|--------------|
| <b>Experimental Details</b> .....                                                                       | <b>S1-2</b>  |
| <b>X-ray Data Collection, Structure, Solution, Refinement</b> .....                                     | <b>S3-28</b> |
| <b>Table S1.</b> Crystal data and structure refinement for <b>1</b> .....                               | S4           |
| <b>Table S2.</b> Atomic coordinates and equivalent isotropic displacement parameters for <b>1</b> ..... | S6           |
| <b>Table S3.</b> Bond lengths [Å] and angles [°] for <b>1</b> .....                                     | S9           |
| <b>Table S4.</b> Anisotropic displacement parameters for <b>1</b> .....                                 | S10          |
| <b>Table S5.</b> Crystal data and structure refinement for <b>2</b> .....                               | S14          |
| <b>Table S6.</b> Atomic coordinates and equivalent isotropic displacement parameters for <b>2</b> ..... | S16          |
| <b>Table S7.</b> Bond lengths [Å] and angles [°] for <b>2</b> .....                                     | S17          |
| <b>Table S8.</b> Anisotropic displacement parameters for <b>2</b> .....                                 | S20          |
| <b>Figure S1.</b> ORTEP Representation of <b>2</b> .....                                                | S21          |
| <b>References</b> .....                                                                                 | <b>S21</b>   |

## EXPERIMENTAL DETAILS

All manipulations and syntheses described below were conducted with the rigorous exclusion of air and water using standard Schlenk line and glovebox techniques under an argon atmosphere. Solvents were sparged with UHP argon and dried by passage through columns containing Q-5 and molecular sieves prior to use. IR samples were prepared as KBr pellets or thin films, and the spectra were obtained on a Jasco FT/IR-4700 - ATR-PRO ONE system or a Thermo Scientific Nicolet iS5 spectrophotometer with an iD5 ATR attachment. Elemental analyses were performed on a Perkin-Elmer 2400 Series II CHNS elemental analyzer. UV-vis spectra were collected in THF at 298 K using a Varian Cary 60 Scan UV-vis spectrophotometer. Potassium metal (Aldrich) was used as received.  $\text{KC}_8$ ,<sup>1</sup>  $\text{Cp}^{\text{tet}}_3\text{U}^2$  and  $\text{U}(\text{NR}_2)_3^3$  were prepared according to literature procedures. 2.2.2-Cryptand (4,7,13,16,21,24-hexaoxa-1,10-diazabicyclo[8.8.8]hexacosane, Aldrich) was placed under vacuum ( $10^{-4}$  Torr) for 12 h before use.

**[K(2.2.2-cryptand)][Cp<sup>tet</sup><sub>3</sub>U], 1.** In an argon-filled glovebox, Cp<sup>tet</sup><sub>3</sub>U (73 mg, 0.121 mmol) and 2.2.2-cryptand (46 mg, 0.122 mmol) were dissolved in THF (2 mL) and chilled to -35 °C in the glovebox freezer. The brown solution was added to a chilled scintillation vial containing a K smear and stored at -35 °C overnight. The resultant dark black/brown solution was layered with chilled hexanes (5 mL) and stored at -35 °C for 3 days to yield **1** as black single-crystals suitable for X-ray diffraction. The mother liquor was decanted, and the crystalline solids were washed three times with 3 mL of Et<sub>2</sub>O and dried under vacuum (3 min) to yield **1** (47 mg, 38%). IR: 2959m, 2923s, 2885s, 2853s, 1477m, 1457m, 1445m, 1354m, 1326m, 1297m, 1259m, 1238m, 1173m, 1134m, 1108s, 1080m, 951m, 933m, 833m, 822m, 753m, 741m, 709m, 697m. Anal. Calcd. for C<sub>45</sub>H<sub>75</sub>N<sub>2</sub>O<sub>6</sub>KU: C, 53.13; H, 7.43; N, 2.75. Found: C, 52.38; H, 7.28; N, 2.82. UV-Vis (THF) λ<sub>max</sub>, nm (ε, M<sup>-1</sup> cm<sup>-1</sup>): 350 (2100 shoulder), 410 (1900), 790 (1800). Due to the high reactivity and paramagnetism of **1**, it was difficult to make assignments for the resonances observed in the NMR spectra of **1** even at low temperature

**[K(crypt)][U(NR<sub>2</sub>)<sub>3</sub>], 2.** In an argon-filled glovebox, U(NR<sub>2</sub>)<sub>3</sub> was combined with 2.2.2-cryptand in THF (2 mL) and cooled to -35 °C in the glovebox freezer. The cold purple solution was added to a vial containing KC<sub>8</sub> that had also been cooled to -35 °C and the mixture was allowed to sit for 1 min in the glovebox freezer. The solution was filtered through a pipette fitted with a glass wool filter and layered with cold hexanes before it was stored in the freezer. After 48 h, black crystals were obtained (44 mg, 47% yield). IR: 2814m, 2853w, 1477m, 1458w, 1445m, 1360m, 1354m, 1299m, 1259m, 1238m, 1234s, 1176w, 1134m, 1104s, 1079m, 1000s, 949s, 933w, 865s, 821s, 766m, 752m, 707w, 694w, 662s. Anal. Calcd. for C<sub>36</sub>H<sub>90</sub>N<sub>5</sub>O<sub>6</sub>Si<sub>6</sub>KU: C, 38.10; H,

7.99; N, 6.17. Found: C, 38.45; H, 8.31; N, 6.69. UV-Vis (THF)  $\lambda_{\text{max}}$ , nm ( $\epsilon$ ,  $\text{M}^{-1} \text{cm}^{-1}$ ): 380 (3250), 470 (2000), 515 (1580), 570 (1130), 608 (1080 shoulder), 755 (330). Due to the high reactivity and paramagnetism of **2**, it was difficult to make assignments for the resonances observed in the NMR spectra of **2** even at low temperature

### **X-ray Data Collection, Structure Solution and Refinement for 1.**

A black crystal of approximate dimensions 0.141 x 0.195 x 0.345 mm was mounted in a cryoloop and transferred to a Bruker SMART APEX II diffractometer. The APEX2<sup>4</sup> program package was used to determine the unit-cell parameters and for data collection (30 sec/frame scan time for a sphere of diffraction data). The raw frame data was processed using SAINT<sup>5</sup> and SADABS<sup>6</sup> to yield the reflection data file. Subsequent calculations were carried out using the SHELXTL<sup>7</sup> program. The diffraction symmetry was  $2/m$  and the systematic absences were consistent with the monoclinic space groups  $Cc$  and  $C2/c$ . It was later determined that space group  $C2/c$  was correct.

The structure was solved by dual space methods and refined on  $F^2$  by full-matrix least-squares techniques. The analytical scattering factors<sup>8</sup> for neutral atoms were used throughout the analysis. Hydrogen atoms were included using a riding model. There was one molecule of tetrahydrofuran solvent present.

Least-squares analysis yielded  $wR2 = 0.0864$  and  $Goof = 1.009$  for 528 variables refined against 12621 data ( $0.78 \text{ \AA}$ ),  $R1 = 0.0362$  for those 9615 data with  $I > 2.0\sigma(I)$ .

There were high residuals present in the final difference-Fourier map. It was not possible to determine the nature of the residuals although it was probable that additional tetrahydrofuran solvent was present. The SQUEEZE<sup>9a</sup> routine in the PLATON<sup>9b</sup> program package was used to account for the electrons in the solvent accessible voids.

Definitions:

$$wR2 = [\Sigma[w(F_o^2 - F_c^2)^2] / \Sigma[w(F_o^2)^2]]^{1/2}$$

$$R1 = \Sigma ||F_o| - |F_c|| / \Sigma |F_o|$$

$Goof = S = [\Sigma[w(F_o^2 - F_c^2)^2] / (n-p)]^{1/2}$  where  $n$  is the number of reflections and  $p$  is the total number of parameters refined.

**Table S1.** Crystal data and structure refinement for **1**.

|                     |                                           |
|---------------------|-------------------------------------------|
| Identification code | maa7 (Mary Angadol)                       |
| Empirical formula   | $C_{45} H_{75} K N_2 O_6 U \cdot C_4H_8O$ |
| Formula weight      | 1089.30                                   |
| Temperature         | 133(2) K                                  |
| Wavelength          | 0.71073 $\text{\AA}$                      |
| Crystal system      | Monoclinic                                |
| Space group         | $C2/c$                                    |

Unit cell dimensions  $a = 30.199(5) \text{ \AA}$   $a = 90^\circ$ .

$b = 13.568(2) \text{ \AA}$   $b = 114.7838(17)^\circ$ .

$c = 30.609(7) \text{ \AA}$   $g = 90^\circ$ .

Volume  $11387(4) \text{ \AA}^3$

Z 8

Density (calculated)  $1.271 \text{ Mg/m}^3$

Absorption coefficient  $2.967 \text{ mm}^{-1}$

F(000) 4464

Crystal color black

Crystal size  $0.345 \times 0.195 \times 0.141 \text{ mm}^3$

Theta range for data collection  $1.466$  to  $27.174^\circ$

Index ranges  $-38 \leq h \leq 38$ ,  $-17 \leq k \leq 17$ ,  $-39 \leq l \leq 39$

Reflections collected 64077

Independent reflections 12621 [R(int) = 0.0621]

Completeness to theta =  $25.500^\circ$  99.9 %

Absorption correction Semi-empirical from equivalents

Max. and min. transmission 0.7455 and 0.5981

Refinement method Full-matrix least-squares on F2

Data / restraints / parameters 12621 / 0 / 528

Goodness-of-fit on F2 1.009

Final R indices [ $I > 2\sigma(I)$  = 9615 data]  $R1 = 0.0362$ ,  $wR2 = 0.0795$

R indices (all data,  $0.78 \text{ \AA}$ )  $R1 = 0.0582$ ,  $wR2 = 0.0864$

Largest diff. peak and hole 1.941 and -0.935 e.Å<sup>-3</sup>

**Table S2.** Atomic coordinates (  $\times 10^4$ ) and equivalent isotropic displacement parameters ( $\text{\AA}^2 \times 10^3$ ) for **1**.  $U(\text{eq})$  is defined as one third of the trace of the orthogonalized  $U_{ij}$  tensor.

|       | x       | y | z       | U(eq)   |       |
|-------|---------|---|---------|---------|-------|
| U(1)  | 6715(1) |   | 6982(1) | 8310(1) | 19(1) |
| C(1)  | 6311(2) |   | 6349(4) | 8945(2) | 31(1) |
| C(2)  | 5887(1) |   | 6657(3) | 8545(1) | 26(1) |
| C(3)  | 5912(1) |   | 7697(3) | 8500(1) | 26(1) |
| C(4)  | 6351(1) |   | 8031(4) | 8872(1) | 29(1) |
| C(5)  | 6589(2) |   | 7201(4) | 9145(1) | 30(1) |
| C(6)  | 6416(2) |   | 5316(4) | 9144(2) | 46(1) |
| C(7)  | 5459(1) |   | 6014(4) | 8259(2) | 33(1) |
| C(8)  | 5516(2) |   | 8359(4) | 8163(2) | 30(1) |
| C(9)  | 6485(2) |   | 9091(4) | 8987(2) | 44(1) |
| C(10) | 6131(1) |   | 6065(3) | 7434(1) | 22(1) |
| C(11) | 6565(1) |   | 6244(3) | 7375(1) | 22(1) |
| C(12) | 6613(2) |   | 7279(3) | 7337(1) | 24(1) |
| C(13) | 6210(1) |   | 7738(3) | 7377(1) | 21(1) |
| C(14) | 5916(1) |   | 6985(3) | 7430(1) | 21(1) |
| C(15) | 5919(2) |   | 5065(3) | 7445(2) | 30(1) |
| C(16) | 6885(2) |   | 5462(3) | 7312(2) | 31(1) |

|       |         |         |         |       |
|-------|---------|---------|---------|-------|
| C(17) | 6979(2) | 7793(3) | 7204(2) | 32(1) |
| C(18) | 6086(2) | 8816(3) | 7286(2) | 36(1) |
| C(19) | 7637(1) | 6082(3) | 8651(1) | 25(1) |
| C(20) | 7652(1) | 6505(3) | 9077(1) | 23(1) |
| C(21) | 7663(1) | 7540(3) | 9039(1) | 23(1) |
| C(22) | 7650(1) | 7773(3) | 8582(1) | 23(1) |
| C(23) | 7642(1) | 6867(3) | 8349(1) | 24(1) |
| C(24) | 7709(2) | 5010(3) | 8580(2) | 36(1) |
| C(25) | 7710(1) | 5927(4) | 9517(1) | 31(1) |
| C(26) | 7741(2) | 8281(4) | 9434(2) | 34(1) |
| C(27) | 7704(2) | 8786(3) | 8420(2) | 34(1) |
| K(1)  | 5167(1) | 7409(1) | 4870(1) | 21(1) |
| O(1)  | 4598(1) | 6065(2) | 4136(1) | 26(1) |
| O(2)  | 5597(1) | 5674(2) | 4737(1) | 26(1) |
| O(3)  | 5090(1) | 8960(2) | 4238(1) | 40(1) |
| O(4)  | 5986(1) | 8634(2) | 5058(1) | 34(1) |
| O(5)  | 4460(1) | 8034(2) | 5171(1) | 31(1) |
| O(6)  | 5304(1) | 7108(2) | 5835(1) | 26(1) |
| N(1)  | 4184(1) | 8028(3) | 4129(1) | 33(1) |
| N(2)  | 6153(1) | 6783(2) | 5610(1) | 24(1) |
| C(28) | 3911(2) | 7151(3) | 3876(2) | 36(1) |
| C(29) | 4202(2) | 6454(4) | 3724(2) | 33(1) |



|       |         |          |         |        |
|-------|---------|----------|---------|--------|
| C(30) | 4895(2) | 5436(3)  | 4000(2) | 29(1)  |
| C(31) | 5266(2) | 4959(3)  | 4437(2) | 33(1)  |
| C(32) | 5972(2) | 5219(3)  | 5141(2) | 29(1)  |
| C(33) | 6346(1) | 5984(3)  | 5415(2) | 28(1)  |
| C(34) | 4241(2) | 8697(4)  | 3782(2) | 40(1)  |
| C(35) | 4635(2) | 9454(4)  | 4004(2) | 44(1)  |
| C(36) | 5481(2) | 9662(4)  | 4413(2) | 60(2)  |
| C(37) | 5955(2) | 9137(4)  | 4642(2) | 53(2)  |
| C(38) | 6460(2) | 8204(3)  | 5302(2) | 32(1)  |
| C(39) | 6479(2) | 7640(3)  | 5732(2) | 31(1)  |
| C(40) | 3919(2) | 8529(4)  | 4377(2) | 44(1)  |
| C(41) | 3963(2) | 8015(4)  | 4829(2) | 46(1)  |
| C(42) | 4500(2) | 7708(3)  | 5630(2) | 34(1)  |
| C(43) | 5015(2) | 7732(3)  | 5984(2) | 30(1)  |
| C(44) | 5793(2) | 7076(3)  | 6200(1) | 29(1)  |
| C(45) | 6094(2) | 6433(3)  | 6035(1) | 28(1)  |
| O(7)  | 8403(3) | 7521(7)  | 7403(3) | 185(3) |
| C(46) | 8327(4) | 6415(8)  | 7326(4) | 142(4) |
| C(47) | 8055(5) | 6275(10) | 6845(5) | 189(5) |
| C(48) | 8020(5) | 7095(10) | 6561(5) | 168(5) |
| C(49) | 8169(5) | 7805(10) | 6849(5) | 171(5) |

**Table S3.** Bond lengths [Å] and angles [°] for **1**.

---

|            |          |
|------------|----------|
| U(1)-Cnt1  | 2.566    |
| U(1)-Cnt2  | 2.563    |
| U(1)-Cnt3  | 2.564    |
| U(1)-C(5)  | 2.753(4) |
| U(1)-C(23) | 2.755(4) |
| U(1)-C(14) | 2.762(4) |
| U(1)-C(4)  | 2.788(4) |
| U(1)-C(22) | 2.801(4) |
| U(1)-C(13) | 2.807(4) |
| U(1)-C(10) | 2.808(4) |
| U(1)-C(19) | 2.811(4) |
| U(1)-C(1)  | 2.826(4) |
| U(1)-C(11) | 2.885(4) |
| U(1)-C(3)  | 2.888(4) |
| U(1)-C(12) | 2.892(4) |
| U(1)-C(20) | 2.893(4) |
| U(1)-C(21) | 2.897(4) |
| U(1)-C(2)  | 2.910(4) |

Cnt1-U(1)-Cnt2      120.0

|                |       |
|----------------|-------|
| Cnt1-U(1)-Cnt3 | 119.8 |
| Cnt2-U(1)-Cnt3 | 120.1 |

---

**Table S4.** Anisotropic displacement parameters ( $\text{\AA}^2 \times 10^3$ ) for **1**. The anisotropic displacement factor exponent takes the form:  $-2p^2 [ h^2 a^{*2} U_{11} + \dots + 2 h k a^* b^* U_{12} ]$

---

|       | U11   | U22   | U33   | U23    | U13   | U12   |
|-------|-------|-------|-------|--------|-------|-------|
| U(1)  | 12(1) | 32(1) | 10(1) | -1(1)  | 3(1)  | 0(1)  |
| C(1)  | 21(2) | 54(3) | 20(2) | 7(2)   | 12(2) | 5(2)  |
| C(2)  | 17(2) | 46(3) | 18(2) | 1(2)   | 10(2) | 1(2)  |
| C(3)  | 17(2) | 46(3) | 16(2) | 1(2)   | 9(2)  | 5(2)  |
| C(4)  | 16(2) | 54(3) | 18(2) | -5(2)  | 9(2)  | 3(2)  |
| C(5)  | 17(2) | 62(3) | 11(2) | 0(2)   | 6(2)  | 6(2)  |
| C(6)  | 32(3) | 66(4) | 42(3) | 22(3)  | 19(2) | 2(3)  |
| C(7)  | 20(2) | 54(3) | 26(2) | 2(2)   | 10(2) | -1(2) |
| C(8)  | 23(2) | 47(3) | 23(2) | 1(2)   | 12(2) | 7(2)  |
| C(9)  | 33(3) | 62(4) | 37(3) | -19(3) | 14(2) | 5(3)  |
| C(10) | 21(2) | 30(2) | 12(2) | -1(2)  | 4(2)  | -1(2) |
| C(11) | 18(2) | 37(3) | 6(2)  | -3(2)  | 1(2)  | 2(2)  |
| C(12) | 23(2) | 35(3) | 10(2) | -2(2)  | 5(2)  | -4(2) |

|       |       |       |       |        |       |        |
|-------|-------|-------|-------|--------|-------|--------|
| C(13) | 22(2) | 25(2) | 13(2) | 0(2)   | 5(2)  | 1(2)   |
| C(14) | 17(2) | 30(2) | 14(2) | -1(2)  | 3(2)  | 1(2)   |
| C(15) | 34(2) | 33(3) | 23(2) | -3(2)  | 13(2) | -1(2)  |
| C(16) | 30(2) | 43(3) | 18(2) | -6(2)  | 8(2)  | 6(2)   |
| C(17) | 31(2) | 48(3) | 19(2) | -1(2)  | 12(2) | -10(2) |
| C(18) | 43(3) | 34(3) | 27(2) | 3(2)   | 12(2) | 4(2)   |
| C(19) | 14(2) | 35(3) | 21(2) | -2(2)  | 3(2)  | -1(2)  |
| C(20) | 11(2) | 39(3) | 17(2) | 2(2)   | 4(2)  | -2(2)  |
| C(21) | 15(2) | 36(3) | 18(2) | -3(2)  | 5(2)  | 2(2)   |
| C(22) | 16(2) | 33(3) | 16(2) | -1(2)  | 3(2)  | -4(2)  |
| C(23) | 14(2) | 39(3) | 18(2) | -3(2)  | 6(2)  | -3(2)  |
| C(24) | 30(2) | 35(3) | 35(3) | 0(2)   | 6(2)  | 7(2)   |
| C(25) | 16(2) | 49(3) | 22(2) | 7(2)   | 1(2)  | 3(2)   |
| C(26) | 21(2) | 47(3) | 28(2) | -13(2) | 4(2)  | -2(2)  |
| C(27) | 25(2) | 35(3) | 33(3) | 5(2)   | 5(2)  | -3(2)  |
| K(1)  | 17(1) | 23(1) | 21(1) | -2(1)  | 7(1)  | -1(1)  |
| O(1)  | 22(1) | 34(2) | 17(1) | -4(1)  | 4(1)  | 0(1)   |
| O(2)  | 22(2) | 23(2) | 28(2) | -2(1)  | 6(1)  | -1(1)  |
| O(3)  | 29(2) | 30(2) | 42(2) | 13(2)  | -2(1) | -2(1)  |
| O(4)  | 24(2) | 37(2) | 33(2) | 13(1)  | 3(1)  | -7(1)  |
| O(5)  | 23(2) | 38(2) | 35(2) | -6(2)  | 14(1) | 0(1)   |
| O(6)  | 26(2) | 32(2) | 23(1) | -6(1)  | 13(1) | -3(1)  |

N(1) 18(2) 38(2) 35(2) -2(2) 3(2) 2(2)  
N(2) 22(2) 30(2) 18(2) 2(1) 7(1) -2(1)  
C(28) 17(2) 48(3) 31(2) -2(2) -1(2) -3(2)  
C(29) 28(2) 39(3) 19(2) -3(2) -3(2) -6(2)  
C(30) 25(2) 34(3) 28(2) -10(2) 11(2) -4(2)  
C(31) 27(2) 30(3) 40(3) -12(2) 12(2) -4(2)  
C(32) 29(2) 29(3) 27(2) 5(2) 10(2) 4(2)  
C(33) 20(2) 37(3) 27(2) 7(2) 8(2) 6(2)  
C(34) 30(3) 37(3) 34(3) 5(2) -4(2) 6(2)  
C(35) 40(3) 31(3) 45(3) 10(2) 2(2) 6(2)  
C(36) 45(3) 43(3) 68(4) 24(3) -1(3) -15(3)  
C(37) 32(3) 60(4) 52(3) 32(3) 3(2) -16(3)  
C(38) 20(2) 40(3) 31(2) 5(2) 4(2) -8(2)  
C(39) 20(2) 38(3) 25(2) 4(2) 1(2) -7(2)  
C(40) 20(2) 56(3) 48(3) -8(3) 4(2) 15(2)  
C(41) 18(2) 69(4) 51(3) -10(3) 14(2) 5(2)  
C(42) 39(3) 31(3) 48(3) 6(2) 34(2) 6(2)  
C(43) 48(3) 23(2) 30(2) 3(2) 28(2) 4(2)  
C(44) 30(2) 40(3) 15(2) -2(2) 6(2) -9(2)  
C(45) 21(2) 37(3) 19(2) 5(2) 3(2) -4(2)

---

## **X-ray Data Collection, Structure Solution and Refinement for 2.**

A black crystal of approximate dimensions 0.214 x 0.318 x 0.389 mm was mounted in a cryoloop and transferred to a Bruker SMART APEX II diffractometer. The APEX2<sup>4</sup> program package was used to determine the unit-cell parameters and for data collection (60 sec/frame scan time for a sphere of diffraction data). The raw frame data was processed using SAINT<sup>5</sup> and SADABS<sup>6</sup> to yield the reflection data file. Subsequent calculations were carried out using the SHELXTL<sup>7</sup> program. The systematic absences were consistent with the hexagonal space group *R*32. The trigonal space group *R*32 was assigned and later determined to be correct.

The structure was solved by dual space methods and refined on  $F^2$  by full-matrix least-squares techniques. The analytical scattering factors<sup>8</sup> for neutral atoms were used throughout the analysis.

Hydrogen atoms were included using a riding model. Several atoms were disordered and included with partial site-occupancy-factors.

Least-squares analysis yielded  $wR2 = 0.0590$  and  $Goof = 1.049$  for 110 variables refined against 2443 data (0.80 Å),  $R1 = 0.0238$  for those 2317 data with  $I > 2.0\sigma(I)$ .

There were several high residuals present in the final difference-Fourier map. It was not possible to determine the nature of the residuals although it was probable that THF solvent was present. The SQUEEZE<sup>9a</sup> routine in the PLATON<sup>9b</sup> program package was used to account for the electrons in the solvent accessible voids.

**Table S5.** Crystal data and structure refinement for **2**.

|                                 |                                                              |  |  |
|---------------------------------|--------------------------------------------------------------|--|--|
| Identification code             | ajr4 (Austin Ryan)                                           |  |  |
| Empirical formula               | $C_{36} H_{90} K N_5 O_6 Si_6 U$                             |  |  |
| Formula weight                  | 1134.79                                                      |  |  |
| Temperature                     | 88(2) K                                                      |  |  |
| Wavelength                      | 0.71073 Å                                                    |  |  |
| Crystal system                  | Trigonal                                                     |  |  |
| Space group                     | R32                                                          |  |  |
| Unit cell dimensions            | a = 18.4169(17) Å    a = 90°.                                |  |  |
|                                 | b = 18.4169(17) Å    b = 90°.                                |  |  |
|                                 | c = 18.1996(17) Å    g = 120°.                               |  |  |
| Volume                          | 5346.0(11) Å <sup>3</sup>                                    |  |  |
| Z                               | 3                                                            |  |  |
| Density (calculated)            | 1.057 Mg/m <sup>3</sup>                                      |  |  |
| Absorption coefficient          | 2.468 mm <sup>-1</sup>                                       |  |  |
| F(000)                          | 1752                                                         |  |  |
| Crystal color                   | Black                                                        |  |  |
| Crystal size                    | 0.389 x 0.318 x 0.214 mm <sup>3</sup>                        |  |  |
| Theta range for data collection | 1.698 to 26.384°                                             |  |  |
| Index ranges                    | $-22 \leq h \leq 22, -22 \leq k \leq 22, -22 \leq l \leq 22$ |  |  |
| Reflections collected           | 19702                                                        |  |  |
| Independent reflections         | 2443 [R(int) = 0.0373]                                       |  |  |

Completeness to theta = 25.500° 99.9 %

Absorption correction Semi-empirical from equivalents

Max. and min. transmission 0.4296 and 0.3334

Refinement method Full-matrix least-squares on F2

Data / restraints / parameters 2443 / 0 / 110

Goodness-of-fit on F2 1.049

Final R indices [ $I > 2\sigma(I)$  = 2317 data] R1 = 0.0238, wR2 = 0.0583

R indices (all data, 0.80 Å) R1 = 0.0266, wR2 = 0.0590

Absolute structure parameter 0.008(7)

Largest diff. peak and hole 1.078 and -0.449 e.Å<sup>-3</sup>



**Table S6.** Atomic coordinates (x 10<sup>4</sup>) and equivalent isotropic displacement parameters (Å<sup>2</sup>x 10<sup>3</sup>) for **2**. U(eq) is defined as one third of the trace of the orthogonalized U<sub>ij</sub> tensor.

|       | x        | y       | z        | U(eq)    |       |
|-------|----------|---------|----------|----------|-------|
| U(1)  | 10000    | 10000   | 4774(1)  | 22(1)    |       |
| Si(1) | 9456(1)  |         | 8020(1)  | 5676(1)  | 37(1) |
| N(1)  | 10000    | 8731(2) | 5000     | 32(1)    |       |
| C(1)  | 10150(3) |         | 7967(3)  | 6402(2)  | 43(1) |
| C(2)  | 8885(8)  |         | 8492(7)  | 6173(6)  | 41(2) |
| C(2A) | 8563(8)  |         | 8107(8)  | 6130(7)  | 47(3) |
| C(3)  | 8690(20) |         | 6890(20) | 5300(20) | 49(5) |
| C(3A) | 8900(30) |         | 6970(20) | 5350(20) | 69(9) |
| K(1)  | 6667     | 3333    | 3333     | 24(1)    |       |
| O(1)  | 8098(2)  |         | 4571(2)  | 4085(1)  | 35(1) |
| N(2)  | 6667     | 3333    | 4952(2)  | 28(1)    |       |
| C(4)  | 7540(2)  |         | 3838(3)  | 5213(1)  | 34(1) |
| C(5)  | 8027(2)  |         | 4681(2)  | 4855(1)  | 37(1) |
| C(6)  | 8563(3)  |         | 5362(2)  | 3725(2)  | 43(1) |

**Table S7.** Bond lengths [Å] and angles [°] for **2**.

---

|              |            |
|--------------|------------|
| U(1)-U(1)#1  | 0.8226(6)  |
| U(1)-N(1)    | 2.372(4)   |
| U(1)-N(1)#2  | 2.372(4)   |
| U(1)-N(1)#3  | 2.372(4)   |
| U(1)-C(2)#1  | 3.033(12)  |
| U(1)-C(2)#4  | 3.033(11)  |
| U(1)-C(2)#5  | 3.033(11)  |
| U(1)-Si(1)#4 | 3.3640(11) |
| U(1)-Si(1)#5 | 3.3641(11) |
| U(1)-Si(1)#1 | 3.3642(11) |
| Si(1)-N(1)   | 1.709(2)   |
| Si(1)-C(3A)  | 1.78(4)    |
| Si(1)-C(1)   | 1.874(4)   |
| Si(1)-C(2)   | 1.895(12)  |
| Si(1)-C(2A)  | 1.918(13)  |
| Si(1)-C(3)   | 1.96(3)    |
| Si(1)-U(1)#1 | 3.3641(11) |
| N(1)-Si(1)#4 | 1.709(2)   |
| N(1)-U(1)#1  | 2.372(4)   |
| C(2)-U(1)#1  | 3.033(11)  |

K(1)-O(1)#6 2.830(2)  
K(1)-O(1)#7 2.830(2)  
K(1)-O(1)#8 2.831(2)  
K(1)-O(1) 2.831(2)  
K(1)-O(1)#9 2.831(2)  
K(1)-O(1)#10 2.831(2)  
K(1)-N(2) 2.946(3)  
K(1)-N(2)#8 2.947(3)  
O(1)-C(6) 1.427(4)  
O(1)-C(5) 1.430(3)  
N(2)-C(4)#7 1.476(3)  
N(2)-C(4)#9 1.476(3)  
N(2)-C(4) 1.476(3)  
C(4)-C(5) 1.499(6)  
C(6)-C(6)#8 1.488(7)

U(1)#1-U(1)-N(1) 80.016(19)  
U(1)#1-U(1)-N(1)#2 80.02(2)  
N(1)-U(1)-N(1)#2 117.060(11)  
U(1)#1-U(1)-N(1)#3 80.02(2)  
N(1)-U(1)-N(1)#3 117.060(12)  
N(1)#2-U(1)-N(1)#3 117.060(11)

U(1)#1-U(1)-C(2)#1 124.6(2)  
N(1)-U(1)-C(2)#1 83.3(2)  
N(1)#2-U(1)-C(2)#1 152.0(2)  
N(1)#3-U(1)-C(2)#1 62.0(2)  
U(1)#1-U(1)-C(2)#4 124.6(2)  
N(1)-U(1)-C(2)#4 62.0(2)  
N(1)#2-U(1)-C(2)#4 83.3(2)  
N(1)#3-U(1)-C(2)#4 152.0(2)  
C(2)#1-U(1)-C(2)#4 90.9(3)  
U(1)#1-U(1)-C(2)#5 124.6(2)

---

Symmetry transformations used to generate equivalent atoms:

#1  $y, x, -z+1$  #2  $-y+2, x-y+1, z$  #3  $-x+y+1, -x+2, z$

#4  $-x+2, -x+y+1, -z+1$  #5  $x-y+1, -y+2, -z+1$  #6  $-x+4/3, -x+y+2/3, -z+2/3$

#7  $-x+y+1, -x+1, z$  #8  $y+1/3, x-1/3, -z+2/3$  #9  $-y+1, x-y, z$

#10  $x-y+1/3, -y+2/3, -z+2/3$

**Table S8.** Anisotropic displacement parameters ( $\text{\AA}^2 \times 10^3$ ) for **2**. The anisotropic displacement factor exponent takes the form:  $-2p^2 [ h^2 a^*2U_{11} + \dots + 2 h k a^* b^* U_{12} ]$

|       | U11    | U22    | U33   | U23   | U13     | U12    |
|-------|--------|--------|-------|-------|---------|--------|
| U(1)  | 22(1)  | 22(1)  | 21(1) | 0     | 0       | 11(1)  |
| Si(1) | 60(1)  | 43(1)  | 20(1) | 0(1)  | 1(1)    | 33(1)  |
| N(1)  | 50(3)  | 31(2)  | 20(2) | -4(1) | -9(2)   | 25(1)  |
| C(1)  | 75(3)  | 46(2)  | 22(2) | 4(1)  | -3(2)   | 42(2)  |
| C(2)  | 54(7)  | 47(7)  | 27(4) | 8(5)  | 10(5)   | 29(6)  |
| C(2A) | 54(8)  | 45(7)  | 41(5) | 6(6)  | 10(5)   | 24(6)  |
| C(3)  | 47(14) | 34(7)  | 37(7) | 1(5)  | -14(7)  | -1(8)  |
| C(3A) | 70(20) | 56(12) | 36(8) | 17(7) | -13(11) | -5(12) |
| K(1)  | 27(1)  | 27(1)  | 17(1) | 0     | 0       | 14(1)  |
| O(1)  | 38(1)  | 33(1)  | 20(1) | -2(1) | -1(1)   | 7(1)   |
| N(2)  | 33(1)  | 33(1)  | 18(2) | 0     | 0       | 17(1)  |
| C(4)  | 37(2)  | 50(3)  | 18(1) | -5(2) | -5(1)   | 23(2)  |
| C(5)  | 37(2)  | 40(2)  | 20(1) | -6(1) | -3(1)   | 10(2)  |
| C(6)  | 42(2)  | 35(2)  | 30(2) | -4(2) | -1(2)   | 2(2)   |

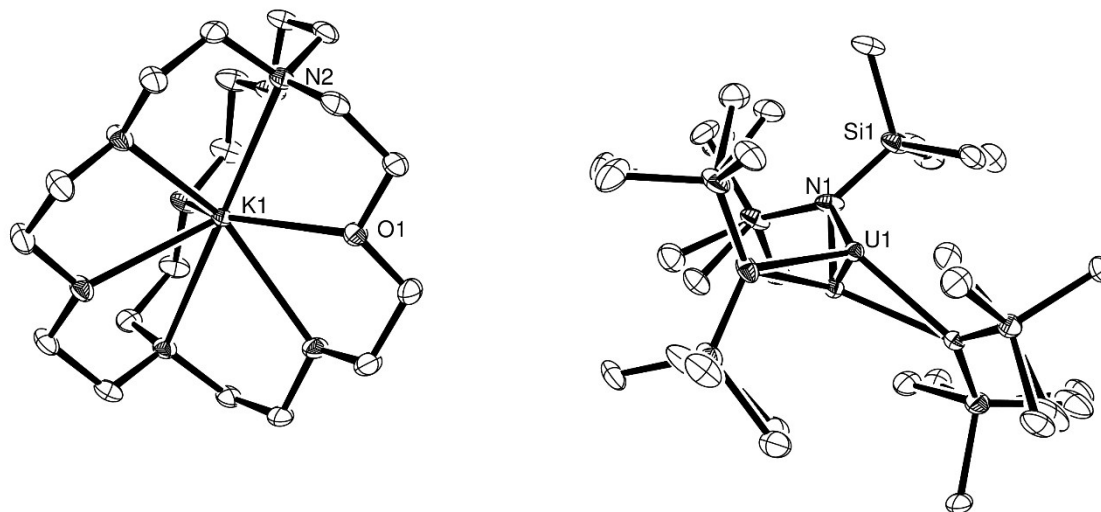

**Figure S1.** ORTEP representation of **2** with ellipsoids drawn at the 50% probability level. Hydrogen atoms omitted for clarity.

## References

1. D. E. Bergbreiter and J. M. Killough, *J. Am. Chem. Soc.*, 1978, **100**, 2126-2134.
2. W. J. Evans, S. A. Kozimor, J. W. Ziller, A. A. Fagin and M. N. Bochkarev, *Inorg. Chem.*, 2005, **44**, 3993-4000.
3. R. A. Andersen, *Inorg. Chem.*, 1979, **18**, 1507-1509.
4. APEX2 Version 2014.11-0, Bruker AXS, Inc.; Madison, WI 2014.
5. SAINT Version 8.34a, Bruker AXS, Inc.; Madison, WI 2013.
6. Sheldrick, G. M. SADABS, Version 2014/5, Bruker AXS, Inc.; Madison, WI 2014.
7. Sheldrick, G. M. SHELXTL, Version 2014/7, Bruker AXS, Inc.; Madison, WI 2014.
8. International Tables for Crystallography 1992, Vol. C., Dordrecht: Kluwer Academic Publishers.
9. (a) Spek, A.L. SQUEEZE, *Acta Cryst.* 2015, **C71**, 9-19., (b) Spek, A. L. PLATON, *Acta Cryst.* 2009, **D65**, 148-155.
